# Supplementary material
Source: publisher figshare collection journal article supplement (https://plos.figshare.com/articles/dataset/_/1023323)
Supplement: Supplementary file 1 [file 1]

**Supporting information**


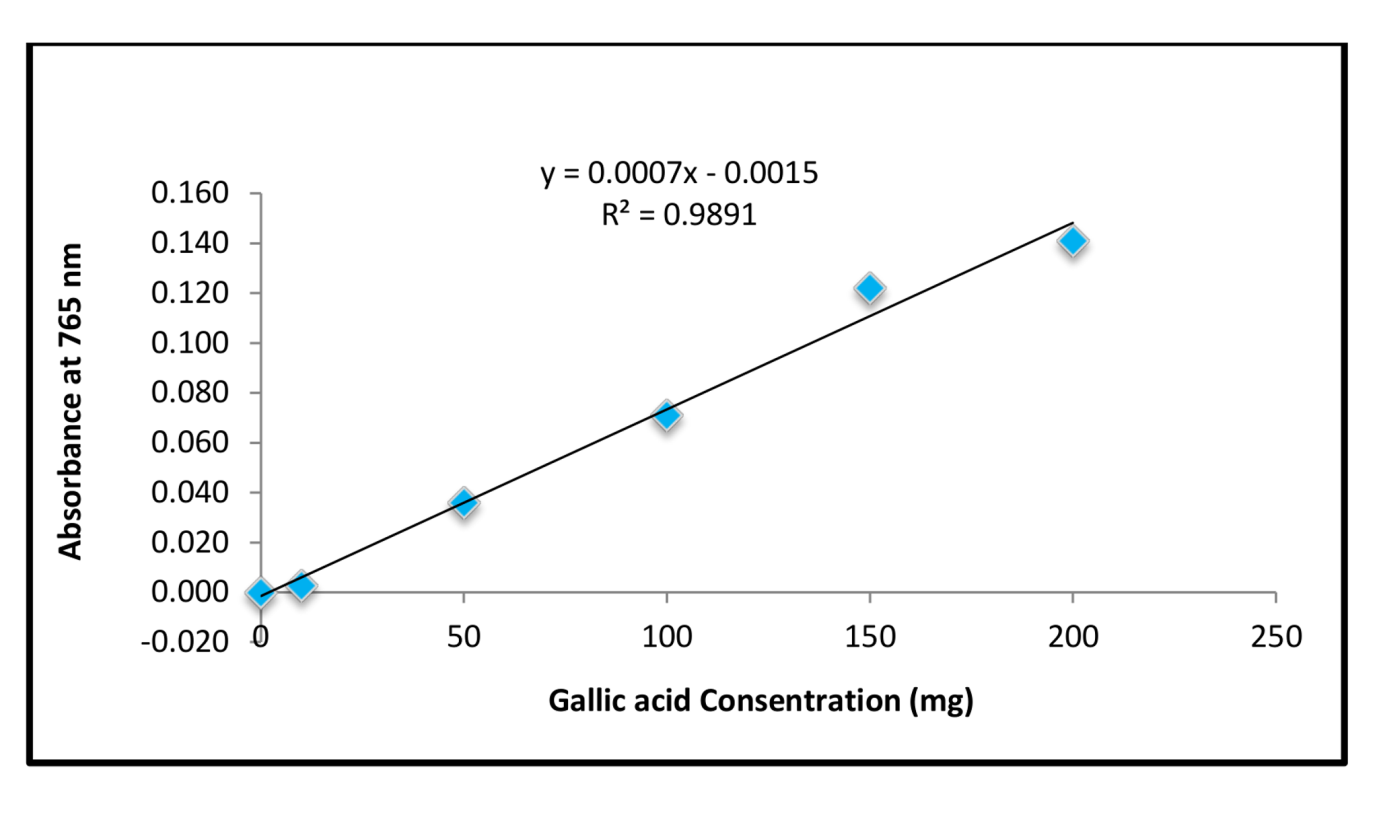
**Figure S1.Total Phenolic Content (TPC) standard curve of the ethanolic extract of *A. ilicifolius.***
